# Supplementary material
Source: PubMed Central journal article supplement (PMC7193528)
Supplement: jamaoncol-6-888-s002.pdf [file jamaoncol-6-888-s002.pdf]

## Supplementary Online Content

Kim RD, Chung V, Alese OB, et al. A phase 2 multi-institutional study of nivolumab for patients with advanced refractory biliary tract cancer. *JAMA Oncol*. Published online April 30, 2020. doi:10.1001/jamaoncol.2020.0930

**eFigure 1.** Waterfall Plot of Best Percentage Change in Tumor Lesion Size From Baseline and Spider Plot of Percentage Change in Tumor Lesion Size From Baseline Over Time by Investigator Assessment

**eFigure 2.** Kaplan-Meier Estimates of Duration of Response in Responders

**eFigure 3.** Kaplan-Meier Estimates of Progression-Free Survival and Overall Survival in Evaluable Patients

**eFigure 4.** Kaplan-Meier Estimates of Progression-Free Survival and Overall Survival by Failed Line of Systemic Therapy

**eFigure 5.** Representative Immunohistochemical Staining of PD-L1 and PD-1

**eFigure 6.** Kaplan-Meier Estimates of Progression-Free Survival and Overall Survival by PD-L1 Expression Status (Cutoff >10%)

**eTable 1.** Patient Characteristics

**eTable 2.** Treatment-Related Adverse Events

This supplementary material has been provided by the authors to give readers additional information about their work.

**Waterfall Plot**

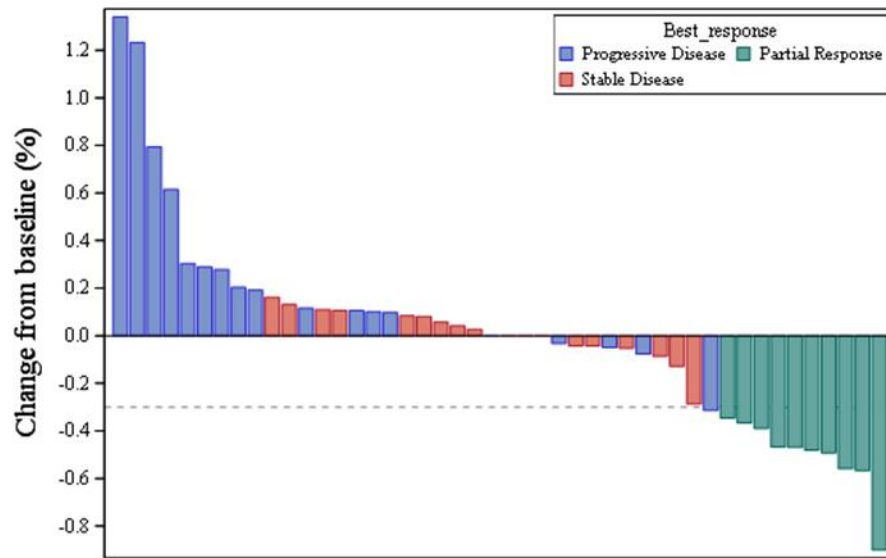

**Spider Plot**

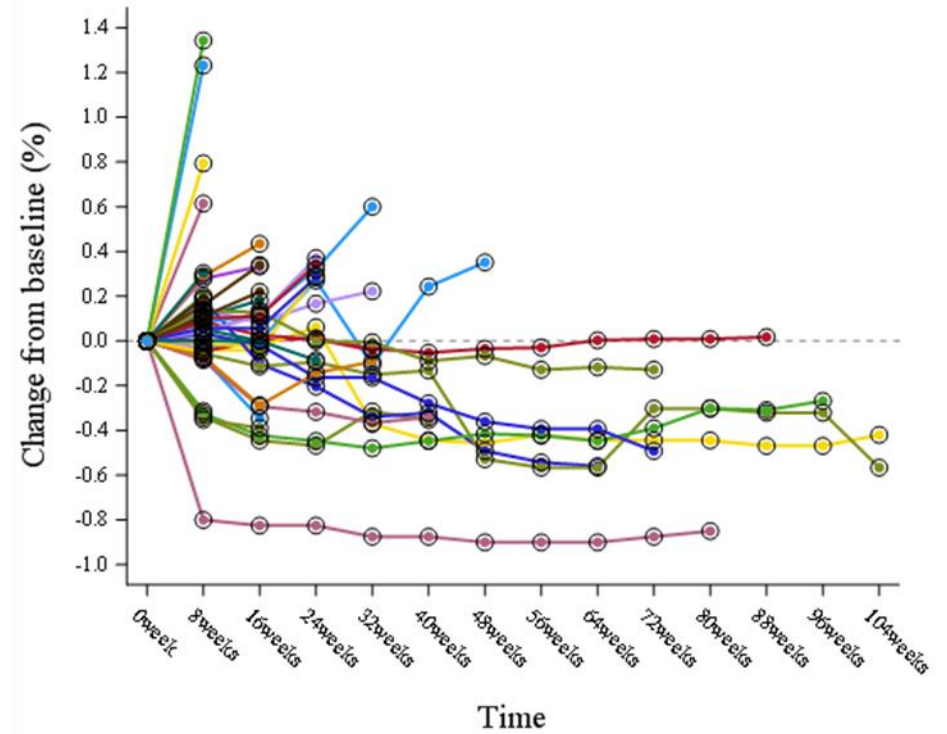

**eFigure 1.** Waterfall Plot of Best Percentage Change in Tumor Lesion Size From Baseline and Spider Plot of Percentage Change in Tumor Lesion Size From Baseline Over Time by Investigator Assessment

## Duration of Response

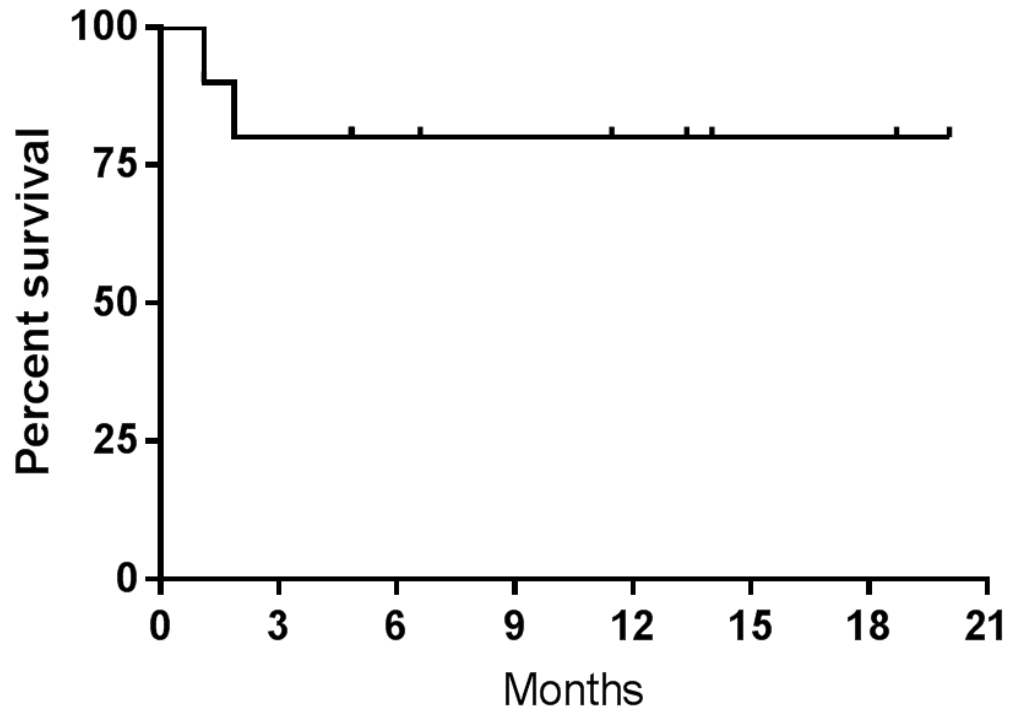

Numbers at risk  
(numbers censored)

| Months          | 0      | 3     | 6     | 9     | 12    | 15    | 18    | 21    |
|-----------------|--------|-------|-------|-------|-------|-------|-------|-------|
| Numbers at risk | 10 (0) | 9 (0) | 7 (2) | 6 (1) | 5 (1) | 3 (2) | 3 (0) | 1 (2) |

**eFigure 2.** Kaplan-Meier Estimates of Duration of Response in Responders

Evaluable patients (N=46)

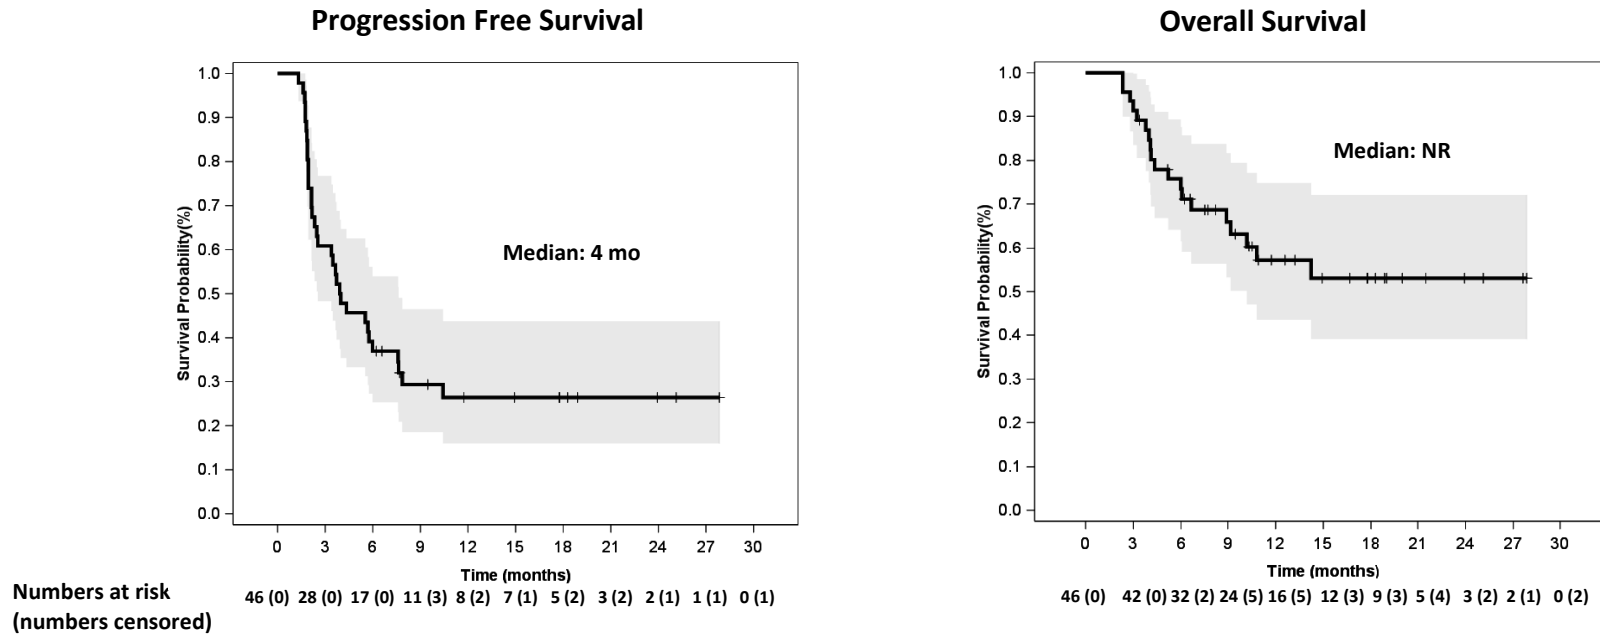

**eFigure 3.** Kaplan-Meier Estimates of Progression-Free Survival and Overall Survival in Evaluable Patients The shaded area represents the 95% confidence interval.

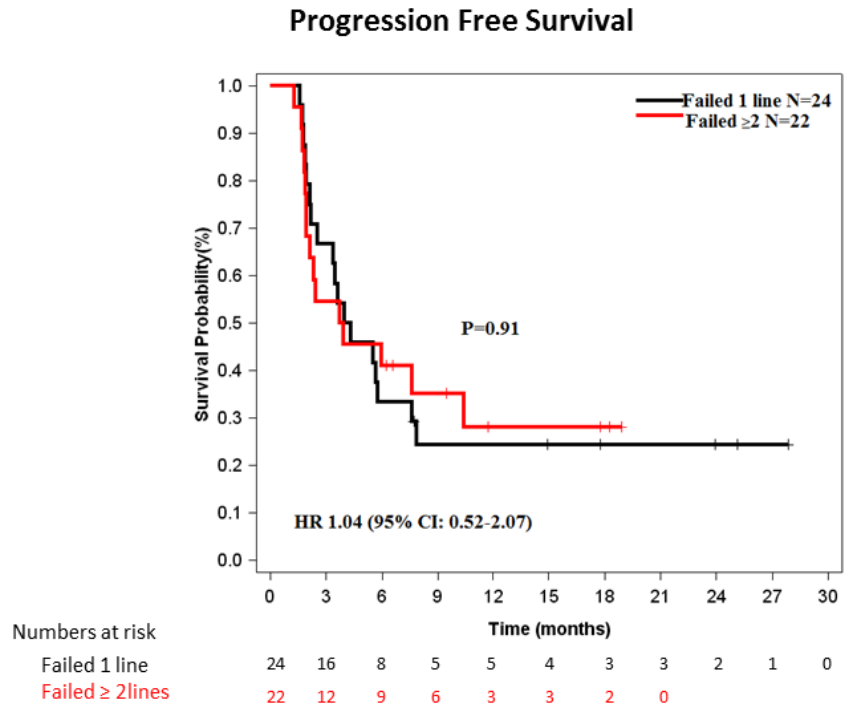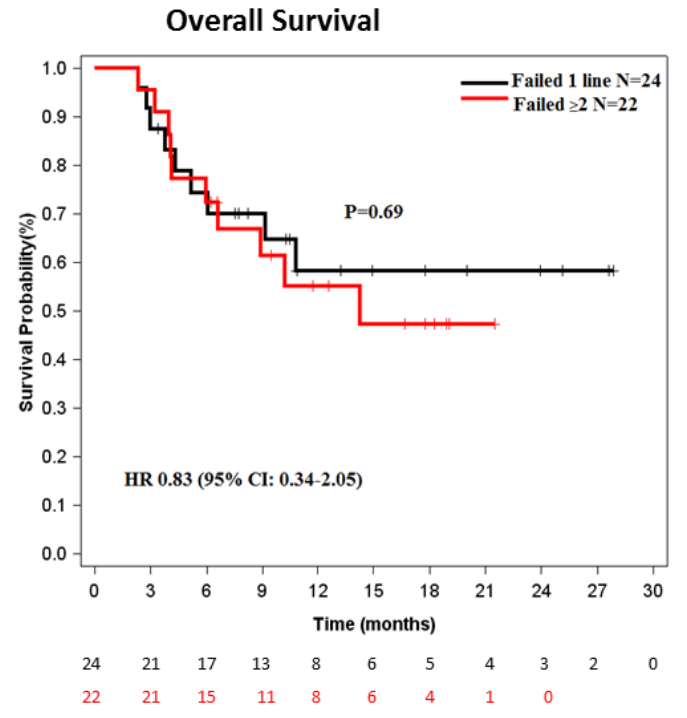

**eFigure 4.** Kaplan-Meier Estimates of Progression-Free Survival and Overall Survival by Failed Line of Systemic Therapy

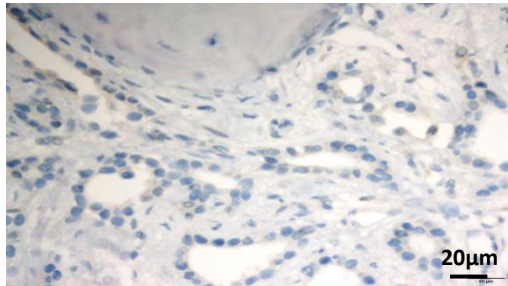

Tumor PD-L1: negative  
TIL PD-1: negative

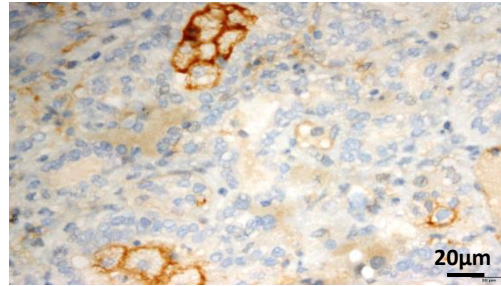

PD-L1: positive (brown)  
PD-1: negative

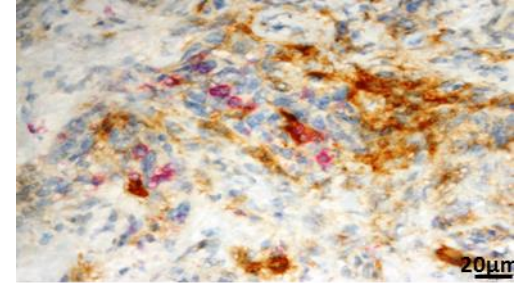

PD-L1: positive (brown)  
PD-1: positive (red)

**eFigure 5.** Representative Immunohistochemical Staining of PD-L1 and PD-1

### Progression Free Survival

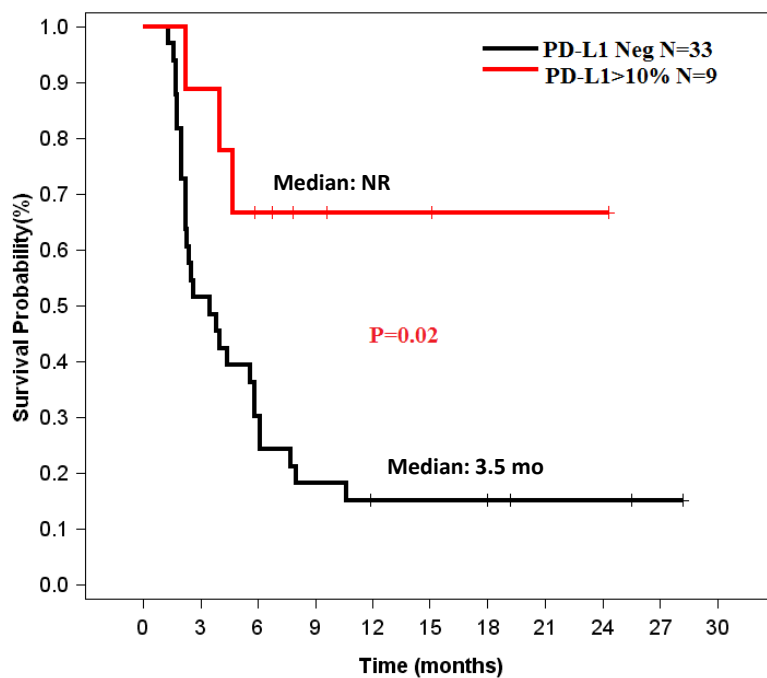

### Overall Survival

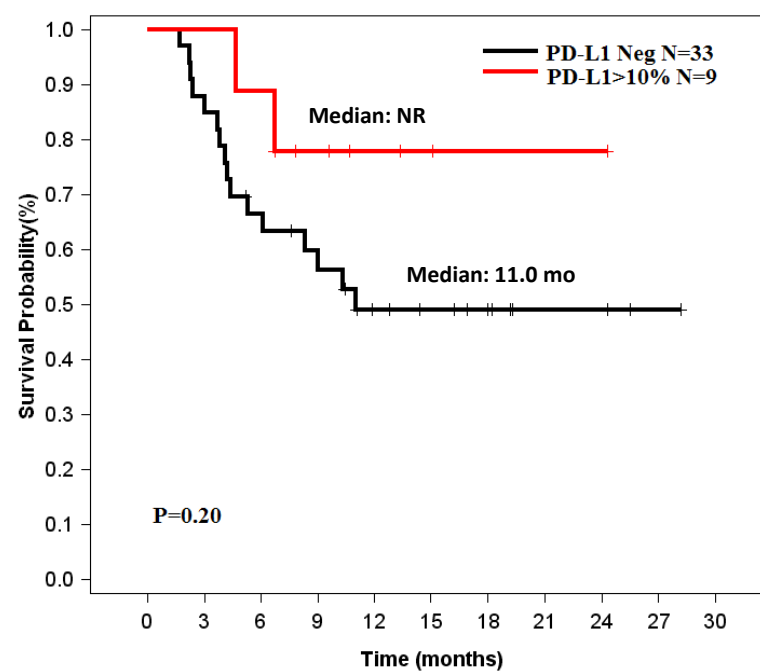

| Numbers at risk    | PD-L1 neg | 33 (0) | 17 (0) | 10 (0) | 6 (0) | 4 (1) | 4 (0) | 4 (1) | 2 (1) | 2 (0) | 1 (1) | 0 (1) |
|--------------------|-----------|--------|--------|--------|-------|-------|-------|-------|-------|-------|-------|-------|
| (numbers censored) | PD-L1>10% | 9 (0)  | 8 (0)  | 5 (1)  | 3 (2) | 2 (1) | 2 (0) | 1 (1) | 1 (0) | 1 (0) | 0 (1) |       |

|        |        |        |        |        |       |       |       |       |       |       |
|--------|--------|--------|--------|--------|-------|-------|-------|-------|-------|-------|
| 33 (0) | 29 (0) | 21 (1) | 17 (2) | 11 (3) | 9 (2) | 7 (3) | 3 (3) | 3 (0) | 1 (2) | 0 (1) |
| 9 (0)  | 9 (0)  | 8 (0)  | 5 (2)  | 3 (2)  | 2 (1) | 1 (1) | 1 (0) | 1 (0) | 0 (1) |       |

**eFigure 6.** Kaplan-Meier Estimates of Progression-Free Survival and Overall Survival by PD-L1 Expression Status (Cutoff >10%)

**eTable 1. Patient Characteristics**

| <b>Variable</b>                    | <b>N=54</b> |
|------------------------------------|-------------|
| <b>Age</b>                         |             |
| median (range)                     | 65 (28-86)  |
| <b>Gender</b>                      |             |
| Male                               | 27 (50%)    |
| Female                             | 27 (50%)    |
| <b>Race</b>                        |             |
| White                              | 35 (64.8%)  |
| Hispanic                           | 8 (14.8%)   |
| African                            | 8 (14.8%)   |
| Asian                              | 3 (5.6%)    |
| <b>ECOG PS</b>                     |             |
| 0                                  | 18 (33.3%)  |
| 1                                  | 36 (66.7%)  |
| <b>Subtype</b>                     |             |
| Intrahepatic                       | 32 (59.3%)  |
| Extrahepatic                       | 5 (9.3%)    |
| Gallbladder                        | 17 (31.5%)  |
| <b>Distant metastasis</b>          |             |
| No (Locally advanced)              | 10 (18.5%)  |
| Yes                                | 44 (81.5%)  |
| <b>Previous Systemic treatment</b> |             |
| 1st line                           | 27 (50%)    |
| 2nd line +                         | 27 (50%)    |



**eTable 2. Treatment-Related Adverse Events**

| Toxicity                                                | Grade (N=54)                                   |          |         |         | Total     |
|---------------------------------------------------------|------------------------------------------------|----------|---------|---------|-----------|
|                                                         | 1                                              | 2        | 3       | 4       |           |
|                                                         | <i>Number of patients with event (percent)</i> |          |         |         |           |
| Alkaline phosphatase increased                          | 6 (11.1)                                       | 5 (9.3)  | 2 (3.7) | 0 (0)   | 13 (24.1) |
| Lymphocyte count decreased                              | 10 (18.5)                                      | 1 (1.9)  | 1 (1.9) | 0 (0)   | 12 (22.2) |
| Aspartate aminotransferase increased                    | 10 (18.5)                                      | 1 (1.9)  | 0 (0)   | 0 (0)   | 11 (20.4) |
| Fatigue                                                 | 5 (9.3)                                        | 5 (9.3)  | 1 (1.9) | 0 (0)   | 11 (20.4) |
| Anemia                                                  | 1 (1.9)                                        | 8 (14.8) | 1 (1.9) | 0 (0)   | 10 (18.5) |
| Alanine aminotransferase increased                      | 7 (13.0)                                       | 2 (3.7)  | 0 (0)   | 0 (0)   | 9 (16.7)  |
| Vomiting                                                | 9 (16.7)                                       | 0 (0)    | 0 (0)   | 0 (0)   | 9 (16.7)  |
| Diarrhea                                                | 5 (9.3)                                        | 1 (1.9)  | 0 (0)   | 0 (0)   | 6 (11.1)  |
| Nausea                                                  | 4 (7.4)                                        | 2 (3.7)  | 0 (0)   | 0 (0)   | 6 (11.1)  |
| Hyponatremia                                            | 1 (1.9)                                        | 0 (0)    | 3 (5.6) | 0 (0)   | 4 (7.4)   |
| Infusion related reaction                               | 1 (1.9)                                        | 3 (5.6)  | 0 (0)   | 0 (0)   | 4 (7.4)   |
| Pruritus                                                | 3 (5.6)                                        | 1 (1.9)  | 0 (0)   | 0 (0)   | 4 (7.4)   |
| Rash maculo-papular                                     | 4 (7.4)                                        | 0 (0)    | 0 (0)   | 0 (0)   | 4 (7.4)   |
| Blood bilirubin increased                               | 1 (1.9)                                        | 1 (1.9)  | 1 (1.9) | 0 (0)   | 3 (5.6)   |
| Hypothyroidism                                          | 2 (3.7)                                        | 1 (1.9)  | 0 (0)   | 0 (0)   | 3 (5.6)   |
| Platelet count decreased                                | 3 (5.6)                                        | 0 (0)    | 0 (0)   | 0 (0)   | 3 (5.6)   |
| Abdominal pain                                          | 1 (1.9)                                        | 0 (0)    | 1 (1.9) | 0 (0)   | 2 (3.7)   |
| Anorexia                                                | 2 (3.7)                                        | 0 (0)    | 0 (0)   | 0 (0)   | 2 (3.7)   |
| Arthritis                                               | 2 (3.7)                                        | 0 (0)    | 0 (0)   | 0 (0)   | 2 (3.7)   |
| Constipation                                            | 2 (3.7)                                        | 0 (0)    | 0 (0)   | 0 (0)   | 2 (3.7)   |
| Dizziness                                               | 2 (3.7)                                        | 0 (0)    | 0 (0)   | 0 (0)   | 2 (3.7)   |
| Hypercalcemia                                           | 1 (1.9)                                        | 1 (1.9)  | 0 (0)   | 0 (0)   | 2 (3.7)   |
| Hyperglycemia                                           | 0 (0)                                          | 1 (1.9)  | 0 (0)   | 1 (1.9) | 2 (3.7)   |
| Hypertension                                            | 0 (0)                                          | 0 (0)    | 2 (3.7) | 0 (0)   | 2 (3.7)   |
| Skin and subcutaneous tissue disorders - Other, specify | 2 (3.7)                                        | 0 (0)    | 0 (0)   | 0 (0)   | 2 (3.7)   |
| Abdominal distension                                    | 1 (1.9)                                        | 0 (0)    | 0 (0)   | 0 (0)   | 1 (1.9)   |

|                                                              |         |         |         |         |         |
|--------------------------------------------------------------|---------|---------|---------|---------|---------|
| Adrenal insufficiency                                        | 0 (0)   | 0 (0)   | 1 (1.9) | 0 (0)   | 1 (1.9) |
| Allergic reaction                                            | 0 (0)   | 1 (1.9) | 0 (0)   | 0 (0)   | 1 (1.9) |
| Arthralgia                                                   | 1 (1.9) | 0 (0)   | 0 (0)   | 0 (0)   | 1 (1.9) |
| Back pain                                                    | 1 (1.9) | 0 (0)   | 0 (0)   | 0 (0)   | 1 (1.9) |
| Blurred vision                                               | 1 (1.9) | 0 (0)   | 0 (0)   | 0 (0)   | 1 (1.9) |
| Colitis                                                      | 0 (0)   | 0 (0)   | 1 (1.9) | 0 (0)   | 1 (1.9) |
| Dyspnea                                                      | 1 (1.9) | 0 (0)   | 0 (0)   | 0 (0)   | 1 (1.9) |
| Edema limbs                                                  | 1 (1.9) | 0 (0)   | 0 (0)   | 0 (0)   | 1 (1.9) |
| Electrocardiogram QT corrected interval prolonged            | 1 (1.9) | 0 (0)   | 0 (0)   | 0 (0)   | 1 (1.9) |
| Endocrine disorders - Other, specify                         | 1 (1.9) | 0 (0)   | 0 (0)   | 0 (0)   | 1 (1.9) |
| Fever                                                        | 0 (0)   | 1 (1.9) | 0 (0)   | 0 (0)   | 1 (1.9) |
| Flushing                                                     | 1 (1.9) | 0 (0)   | 0 (0)   | 0 (0)   | 1 (1.9) |
| Gastrointestinal disorders - Other, specify                  | 1 (1.9) | 0 (0)   | 0 (0)   | 0 (0)   | 1 (1.9) |
| General disorders and administration site conditions - Other | 1 (1.9) | 0 (0)   | 0 (0)   | 0 (0)   | 1 (1.9) |
| Hyperkalemia                                                 | 0 (0)   | 1 (1.9) | 0 (0)   | 0 (0)   | 1 (1.9) |
| Hypermagnesemia                                              | 0 (0)   | 0 (0)   | 1 (1.9) | 0 (0)   | 1 (1.9) |
| Hyperthyroidism                                              | 1 (1.9) | 0 (0)   | 0 (0)   | 0 (0)   | 1 (1.9) |
| Hypoglycemia                                                 | 1 (1.9) | 0 (0)   | 0 (0)   | 0 (0)   | 1 (1.9) |
| Hypokalemia                                                  | 0 (0)   | 0 (0)   | 0 (0)   | 1 (1.9) | 1 (1.9) |
| Hypomagnesemia                                               | 1 (1.9) | 0 (0)   | 0 (0)   | 0 (0)   | 1 (1.9) |
| Hypophosphatemia                                             | 0 (0)   | 1 (1.9) | 0 (0)   | 0 (0)   | 1 (1.9) |
| INR increased                                                | 1 (1.9) | 0 (0)   | 0 (0)   | 0 (0)   | 1 (1.9) |
| Malaise                                                      | 0 (0)   | 1 (1.9) | 0 (0)   | 0 (0)   | 1 (1.9) |
| Musculoskeletal and connective tissue disorder - Other, spe  | 1 (1.9) | 0 (0)   | 0 (0)   | 0 (0)   | 1 (1.9) |
| Pain                                                         | 1 (1.9) | 0 (0)   | 0 (0)   | 0 (0)   | 1 (1.9) |
| Pneumonitis                                                  | 1 (1.9) | 0 (0)   | 0 (0)   | 0 (0)   | 1 (1.9) |
| Rash acneiform                                               | 1 (1.9) | 0 (0)   | 0 (0)   | 0 (0)   | 1 (1.9) |
| Respiratory, thoracic and mediastinal disorders - Other, spe | 1 (1.9) | 0 (0)   | 0 (0)   | 0 (0)   | 1 (1.9) |
| Thromboembolic event                                         | 1 (1.9) | 0 (0)   | 0 (0)   | 0 (0)   | 1 (1.9) |
| Thrombotic thrombocytopenic purpura                          | 1 (1.9) | 0 (0)   | 0 (0)   | 0 (0)   | 1 (1.9) |

|             |         |       |       |       |         |
|-------------|---------|-------|-------|-------|---------|
| Weight gain | 1 (1.9) | 0 (0) | 0 (0) | 0 (0) | 1 (1.9) |
| Weight loss | 1 (1.9) | 0 (0) | 0 (0) | 0 (0) | 1 (1.9) |
| Total       | 108     | 38    | 14    | 2     | 162     |
